# Supplementary material for: Targeting the Nuclear Export Protein XPO1/CRM1 Reverses Epithelial to Mesenchymal Transition
Source: PubMed Central journal article supplement (PMC4633607; doi:10.1038/srep16077), 2015-11-05
Supplement: srep16077-s1.pdf [file srep16077-s1.pdf]

# **Targeting the Nuclear Protein Export Reverses Epithelial to Mesenchymal Transition**

Asfar S. Azmi<sup>1\*</sup>, Irfana Muqbil<sup>1</sup>, Jack Wu<sup>1</sup>, Amro Aboukameel<sup>1</sup>, William Senapdis<sup>3</sup>, Erkan Baloglu<sup>3</sup>, Aliccia bollig-Fisher<sup>1</sup>, Gregory Dyson<sup>1</sup>, Michael Kauffman<sup>3</sup>, Yosef Landesman<sup>3</sup>, Sharon Shacham<sup>3</sup>, Philip A. Philip<sup>1</sup> and Ramzi M. Mohammad<sup>1,2</sup>

Supplemental information

## Supplementary Figure 1

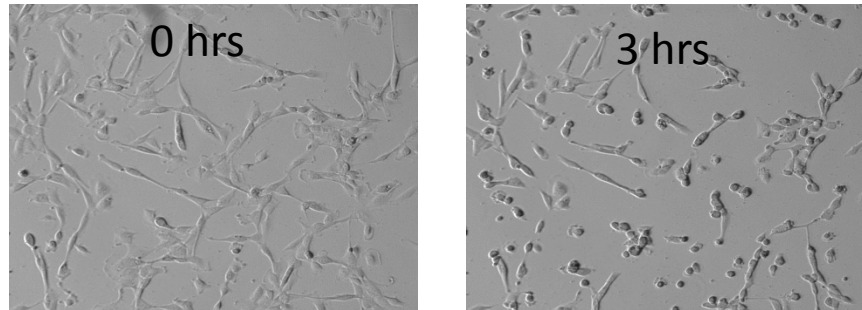

**Supplementary Figure 1. Leptomycin B treatment causes reversal of mesenchymal phenotype to epithelial.** HMLE-Snail cells were grown in 100 mm petri plates overnight. After 24 hrs the media was aspirated and the cells were washed with PBS followed by incubation with LMB (300 nM) for 3 hrs.

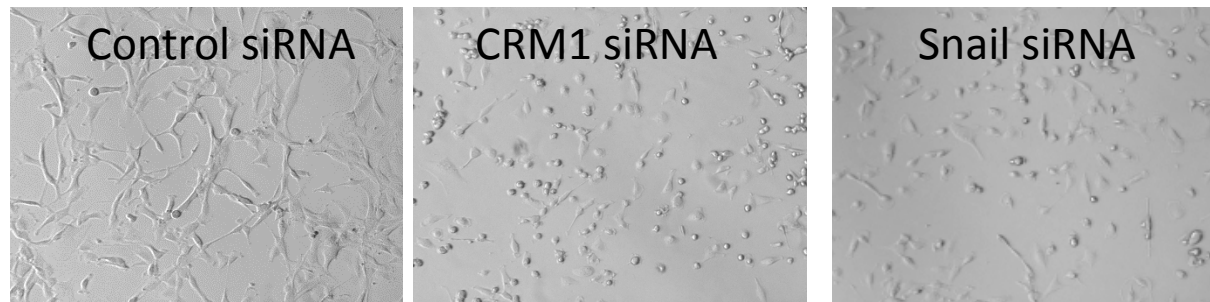

**Supplementary Figure 2. siRNA silencing of CRM1 or snail reverses EMT.** 50,000 HMLE-Snail cells grown in six well plates in duplicate and were exposed to either control siRNA, CRM1 siRNA or Snail siRNA for 72 hrs. At the end of the siRNA treatment cells were trypsinized and re-seeded and again treated with siRNA for 72 hrs. The cells were photographed at 40X magnification using an EVOS microscope system. Images representative of two independent experiments.

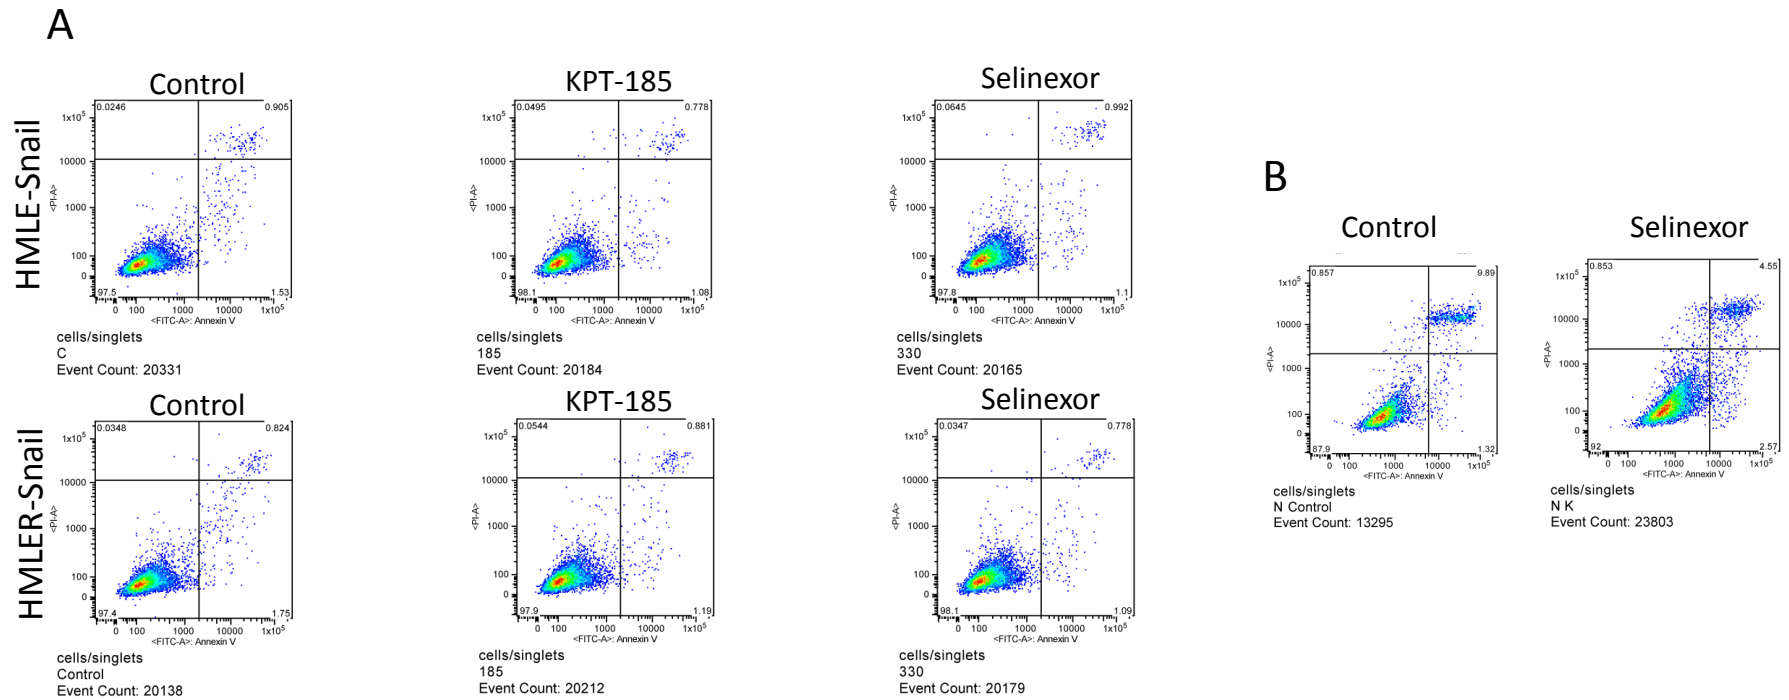

**Supp Fig3. SINE do not induce apoptosis at early time points in HMECs.** HMLE-Snail and HMLER-Snail seeded at a density of 50,000 cell per well in six well plate were grown overnight. After 24 hrs the cells were exposed to either DMSO or 1 micro M concentrations of SINE (KPT-185 or Selinexor KPT-330) for 24 hrs. At the end of the reaction period, the cells were processed for Annexin V FITC apoptosis analysis using Biovision apoptosis assay kit according to manufacturers protocol. Note: no significant apoptosis is observed at 24 hrs (early) time point. **[B] SINE do not induce apoptosis in MCF-10A NeoT normal cells.** MCF10A-NeoT cells were grown at a density of 50,000 cells per well and exposed to selinexor at 150 nM for 72 hrs. Annexin V FITC assay was performed using Biovision Apoptosis analysis kit according to manufacturer's protocol.

## Supplementary Figure 3

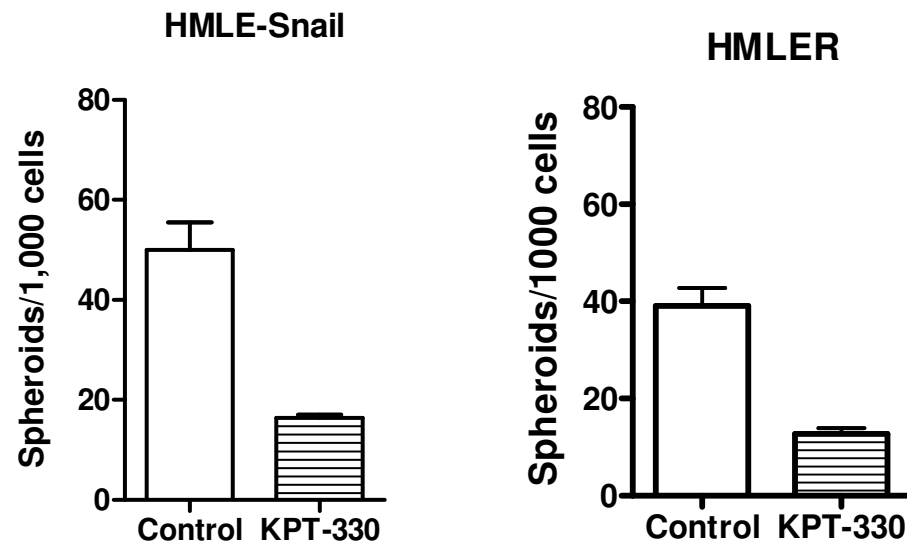

**Supplementary Figure 4.** Selinexor (KPT-330) suppresses spheroids in HMLE cellular models. HMLE-snail or HMLER-snail spheroids were exposed to selinexor (150 nM) once a week for two weeks. The spheroids were counted under an inverted microscope. See methods section for details on the experimental procedure.

## Supplemental Figure 4

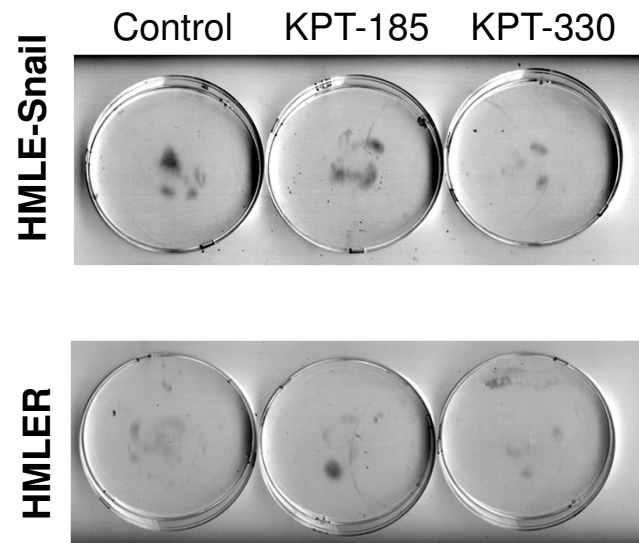

**Supplemental Figure 5.** SINE suppress colony formation in HMEC derived cells. Clonogenic Assay: 50,000 cells seeded in six well plates and allowed to grow for 24 hrs. Once attached, the cells were exposed to XPO1 inhibitors (0-150 nM) for 72 hrs. At the end of the treatment period, 1,000 cells were taken from each reaction well and re-seeded in 100 mm petri dish and allowed to grow for 2 weeks at 37°C in a 5% CO<sub>2</sub>/5% O<sub>2</sub>/90% N<sub>2</sub> incubator. Colonies were stained with 2% crystal violet, counted, and quantitated. SINE suppress colony formation in HMEC derived cells.

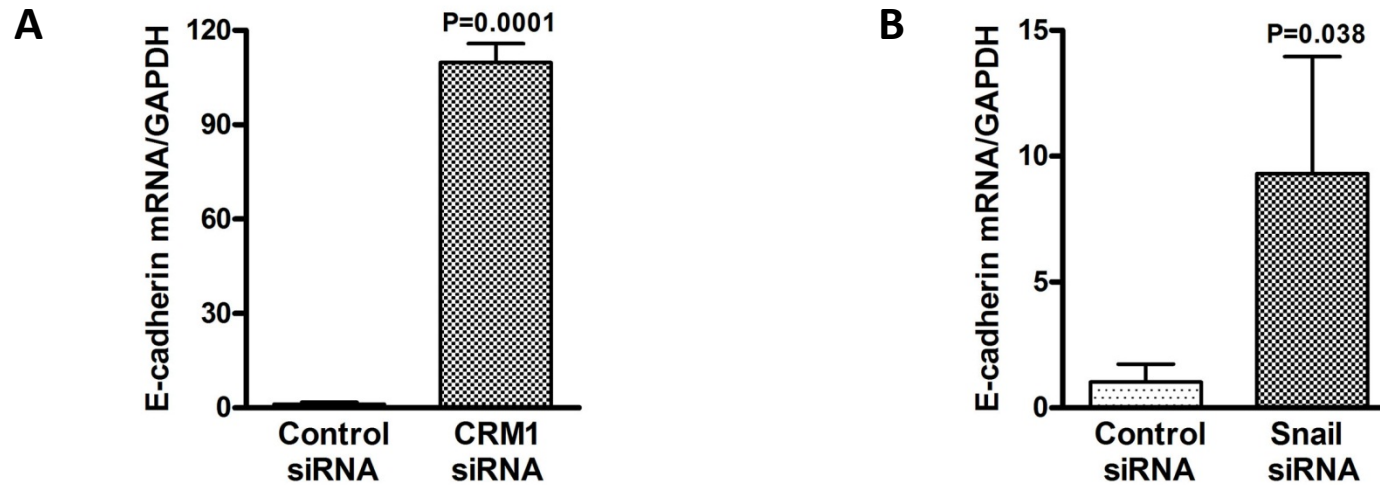

**Figure 6. SiRNA silencing of [A] CRM1 or [B] snail enhances the expression of E-cadherin in HMLE-snail cells.** HMLE-snail cells were exposed to either CRM1 or snail siRNA and RNA was isolated followed by RT-PCR analysis for E-cadherin expression. Graph representative of two independent experiments.

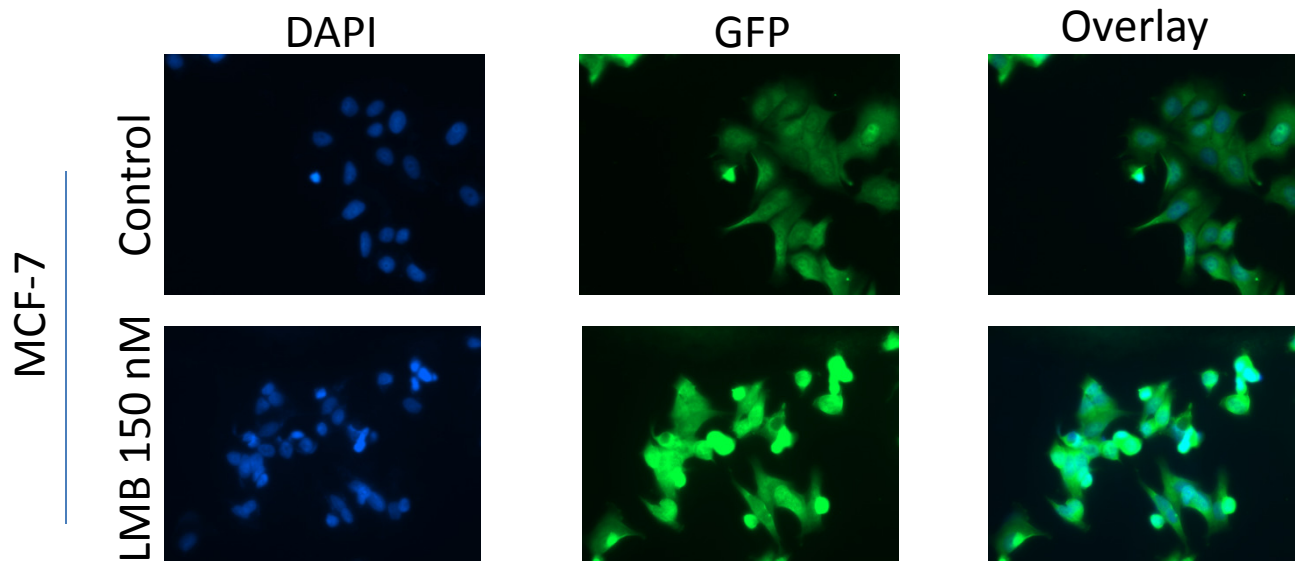

**B**

|                    |   |   |   |   |
|--------------------|---|---|---|---|
| FBXL5 siRNA        | - | - | - | + |
| Control siRNA      | - | - | + | - |
| Selinexor (150 nM) | - | + | + | + |

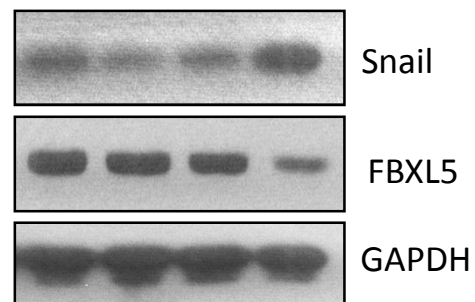

**Supplementary Figure 7. [A]** LMB induces nuclear localization of FBXL5 in MCF-7 breast cancer cells. Cells were grown in 4 well chambered slides at a density of 3000 cells per well. The next day the cells were exposed to 150 nM LMB for further 24 hrs and immunofluorescence was performed using FBXL5 antibody. **[B]** Western blotting of HMLE-Snail exposed to either untreated, control siRNA or FBXL5 siRNA in the presence or absence of selinexor 150 nM. Note: lack of snail reduction upon FBXL5 siRNA treatment Note. Nuclear retention of FBXL5 in treated group. Figure representative of three independent experiment.



# Supplemental Table 1. FBOX family genes are differentially expressed in SINE treated cells and fall under the canonical biologically meaningful pathways

| Network | Molecules in Network                                                                                                                                                                                                                                                                                                                                            | Focus Molecules | Top Functions                                                                                             |
|---------|-----------------------------------------------------------------------------------------------------------------------------------------------------------------------------------------------------------------------------------------------------------------------------------------------------------------------------------------------------------------|-----------------|-----------------------------------------------------------------------------------------------------------|
| 1       | ABAT, ATP2B2, BBS9, CASK, CTH, Cytokeratin, DDIT3, DDX56, ERH, <b>FBOXO3</b> , HES4, IPO5, KIF5C, KRT7, KRT19, KRT6A, Laminin1, LARGE, MT1B, NELLF, PCM1, P mca, POLR1B, PSAT1, Ribosomal 40s subunit, Rnr, RPL13, RPL37, RPS24, RPS15A, RPS3A, RPS6KA, RPSA, RRS1, TRIB3                                                                                       | 28              | Gene Expression, Protein Synthesis, Cancer                                                                |
| 2       | ABCC1, ABCD3, Actin, AIMP2, ANXA3, ATPase, BCCIP, Cbp/p300, CCNK, E2F5, EIF6, EPAS1, FAM60A, GRN, GTF2A1, HAUS6, HIRIP3, HIST1H2BJ/HIST1H2BK, Holo RNA polymerase II, HSPA4L, KIFC2, NHP2L1, NMI, NUDT5, P-TEFb, Rac, RNF213, RUVBL1, SNRNP48, snRNP, Sos, TAF9, TUFT1, tyrosine kinase, ZCRB1                                                                  | 26              | DNA Replication, Recombination, and Repair, Energy Production, Nucleic Acid Metabolism                    |
| 3       | ANGPTL4, BMP10, BMP, BNC2, C8orf33, CLGN, EDA, FST, FUCA1, GFPT2, GLA, GLRX, IgG2a, IgG2b, IL13RA2, IL18BP, IL18R1, IL23A, INF2, IRAK2, IRAK, IRF5, ITM2B, Mhc class ii, NFKB (complex), PCSK5, PPP4R4, RIPK4, SAA, SERCA, SLC11A2, Smad, SPPL2A, TIRAP, ZFAND5                                                                                                 | 26              | Inflammatory Response, Organismal Injury and Abnormalities, Cellular Function and Maintenance             |
| 4       | BDNF, Calmodulin, CASP3, caspase, CLEC4D, CLIC4, CLN8, CNMNA, DNAJC8, DNAJC9, DNAJC15, DNAJC, DYNC1I2, estrogen receptor, FEM1B, FOSX1, HNRNPJ, Hsp27, Hsp70, Hsp90, Hsp22/Hsp40/Hsp90, IGF2, KANK2, LYN, NMDA Receptor, NOS2, p70S6k, Proinsulin, RNF103, S100A4, SEZ6L2, Sod, TIMM13, UNC5B, VEGFA                                                            | 23              | Cell Death and Survival, Nervous System Development and Function, Cellular Movement                       |
| 5       | Alp, ALT, BRD2, CCDC71, CDKN1A, Ck2, COG1, COG5, DDB2, DKK1, DPAGT1, DZIP1, FCRLA, GOT, Histone h3, IgG1, IgG, Igm, Immunoglobulin, Insulin, KAT2B, MTOR, NFE2, PBX3, PFKP, PHEX, RAB17, RNA polymerase II, SAP130, SIGLEC5, SIX1, STAT5a/b, Tnf (family), TYMS, UBQLN1                                                                                         | 22              | Developmental Disorder, Hereditary Disorder, Metabolic Disease                                            |
| 6       | 26s Proteasome, Alpha tubulin, ANKRD28, Beta Tubulin, CALCOCO2, CCDC28A, CCT3, CCT5, CLDN3, ELMOD3, F Actin, FAM90A1, HDAC6, HIPK2, HISTONE, Ikb, LZTS1, MGEA5, NEXN, NFKBIB, NFKBIE, PCDH18, Pka, PP2A, PRKAR1B, RASGRP2, RUNX2, Smad1/5/8, SYNE2, TAGLN, Tnf receptor, TPPP, Troponin t, Tubulin, Ubiquitin                                                   | 22              | Cardiovascular Disease, Cell-To-Cell Signaling and Interaction, Cellular Movement                         |
| 7       | APOBEC3B, BCL2A1, Caveolin, CES1, CLU, CLUAP1, endothelin receptor, Ferritin, Fibrinogen, FIP1L1, FOS, FOSB, FTH1, FTL, glutathione transferase, GST, GSTA4, GSTM4, hemoglobin, HMOX1, IFITM1, IL11, Integrin alpha V beta 3, Ldh, LDL, MLF1, NAB1, NAB2, NADPH oxidase, Pde, PDE7B, RGMA, SOX17, Stat3-Stat3, TSH                                              | 21              | Cellular Development, Cellular Growth and Proliferation, Connective Tissue Development and Function       |
| 8       | 20-alpha-hydroxyprogesterone, AES, APP, ATP2B2, BCAS1, beta-estradiol, CC2D1A, CCDC88B, CGB (includes others), CLDN3, DNAH14, DNAL1, ECH1, GJB2, HRK, HSD17B2, ITGBL1, NCAPG, NUDT9, OSBPL5, PPM1K, PPP1R14A, progesterone, PTGFR, RASGRP2, RER1, RYR3, SERPINA6, SH3GL3, SIX4, SLC30A3, SLC7A2, SPAG9, SULT1E1, TCF15                                          | 22              | Reproductive System Disease, Cell Death and Survival, Nervous System Development and Function             |
| 9       | ABCA7, Akt, atrial natriuretic peptide, CAV3, creatine kinase, CREG1, CTC1, cyclooxygenase, Foxo, FXR ligand-FXR-Retinoic acid-RXR, Growth hormone, HDL, HDL-cholesterol, Kallikrein, LDL-Cholesterol, LPXN, MYL9, Nos, NRA43, OBF1, PCSK9, PCYOX1, PDK4, Ppp2c, PRKAR2B, PVRL2, SCARB1, SEC14L2, SGMS1, SH2B3, SLC9A3R1, SOAT2, SYN M, VLDL-cholesterol, VLDLR | 21              | Lipid Metabolism, Molecular Transport, Small Molecule Biochemistry                                        |
| 10      | ADCY, ADORA2B, ADRB, Ampa Receptor, CHRM4, DUB, EDNRA, FAF2, G protein alpha, G protein alpha, GABBR2, Gi-coupled receptor, Girk, GPER, Gs-coupled receptor, GTPase, LAPT5, LPAR1, MRPL20, MTORC2, NPR3, OAZ1, Pkc(s), Pkg, PLC, Plc beta, PLCB2, RGS4, RHEB, SLC30A3, UBR2, ULK2, USP13, USP47, USP48                                                          | 20              | Carbohydrate Metabolism, Molecular Transport, Small Molecule Biochemistry                                 |
| 11      | Ap1, ATXN10, BAMBI, BTG2, calpain, CaMKII, CCNE1, CENPI, Cg, Creb, EDN1, FJX1, FSH, GLS, Gsk3, Histone h4, HMBS, HSD3B7, IL1, JPH4, Lh, LRP, MCM7, NOS1AP, Notch, NRARP, PDGF BB, PDLIM3, PPARG, Pro-inflammatory Cytokine, PTX3, SLC7A7, SOCS2, SRRT, Tgf beta                                                                                                 | 20              | Organismal Functions, Cell Morphology, Renal and Urological System Development and Function               |
| 12      | AMPK, ASNS, ATP6V1C1, c-Src, Cdc2, CDH18, Cdk, Cyclin A, Cyclin D, Cyclin E, cytochrome C, E2f, FAHD1, FANCG, HMG CoA synthase, HOPX, HOXB9, HPSE, INA, KCNMA1, MPC1, MTORC1, NPC1, NT5C2, OR7C2, PARP, PIK3R3, PPAP2A, PPAP2B, PRKAG2, Rb, SAT1, Secretase gamma, trypsin, Vegf                                                                                | 19              | Cancer, Reproductive System Disease, Carbohydrate Metabolism                                              |
| 13      | AFAP1L2, ARHGDI1, ATF3, CHRNA7, Collagen Alpha1, Eotaxin, Ernf1, Fgf, FGFR3, Fgfr, FRMD3, Gap, GJB2, Hedgehog, HES6, HHIP, Hspg, IGSF8, IL4R, JAK, MGAT5, MMP1, MT2A, Nicotinic acetylcholine receptor, PtdIns, PI3K (complex), PLC gamma, PRRX1, STAT1/3/5 dimer, SYK/ZAP, Tenascin, TIMP3, TWIST1                                                             | 18              | Cellular Growth and Proliferation, Cell Signaling, Connective Tissue Development and Function             |
| 14      | ARHGFE39, C2orf43, COMMD1, DPY19L1, DVL2, ELAVL1, EMC7, FAM136A, GINM1, HKDC1, KCTD14, KDM5B, KIAA0922, LMNA, LRRC37B, LSM1, MIOS, PKD1, RAE1, SCN1D1, SLC22A23, SMARCA4, SUCO, SYVN1, TMEM38B, UBC, VSI10                                                                                                                                                      | 16              | Cellular Assembly and Organization, Organ Morphology, Reproductive System Development and Function        |
| 15      | 14-3-3, ABLIM1, ADAMT51, ARC, BCL2L1, BCR (complex), BPGM, Calcineurin protein(s), CD302, CDA, DHRS9, Ecm, EGR1, EGR2, EGR4, Hdac, Iga, IL7R, Importin alpha, L-type Calcium Channel, MAP2K1/2, methenyltetrahydrofolate cyclohydrolase, MME, MTHFD1, MTHFD1L, MTHFD2L, Nfat (family), OSR1, RAB31P, Raf, Ras, RUNX1T1, Sapk, TOR, TXNRD2                       | 20              | Cellular Compromise, Organismal Injury and Abnormalities, Cell-mediated Immune Response                   |
| 16      | Adaptor protein 1, Caspase 3/7, CFL1, CLCN5, Cofilin, FGD4, GCNT1, GKAP1, Gm-csf, GPS2, HNRNPA3, IRS, Jnk, JUN/JUNB/JUND, KCNJ15, LAMP3, LHX1, Mek, Mic, MSI2, Myosin, NRG (family), PAK6, Pak, PP1 protein complex group, RBM47, Rock, RPS6KA2, Rsk, SESN2, SHANK1, SMPD4, sphingomyelinase, ST6GAL1, TESK2                                                    | 19              | Cellular Assembly and Organization, Hereditary Disorder, Neurological Disease                             |
| 17      | BHLHE40, C/ebp, CiITA, CXCL14, CXCR3, EIF3, EIF4G3, elastase, HEXB, HLA-DR, HLA-DRB5, HSP, IFI44L, IFIT1, Ifn, IFN alpha/beta, IFN Beta, Ifn gamma, IFN type 1, IFNA21, Ige, IL12 (complex), IL22RA1, Interferon alpha, MHC Class II (complex), NfkB1-RelA, P38 MAPK, PCDH7, PI3K (family), PLP1, SEC14L3, SERPINB9, Tlr, TNFSF9, TRIP10                        | 17              | Cellular Function and Maintenance, Hematological System Development and Function, Humoral Immune Response |
| 18      | ABCA6, AOX1, BATF2, BATF3, BCL2A1, CACNB3, Cbp/p300-Maf-Nfe2l2, CEBPD, CYB561, EIF2AK4, FGF1, GCLM, GSTA4, GSTA5, GSTP1, HCP5, IFNG, IKZF2, IL11, KRTAP2-3 (includes others), neuroprotectin D1, NFE2L2, NFE2L3, PRICKLE1, RAB34, SHISA5, SLC14A1, SLC6A1, SLC7A11, SMAD4, TBXAS1, TCTA, TRIM33, UGT2B15                                                        | 17              | Drug Metabolism, Protein Synthesis, Cellular Assembly and Organization                                    |
| 19      | BABAM1, BRD4, CLN3, COMMD1, COMMD7, COPS6, DIS3, <b>FBOXL17</b> , FEZ1, G3BP1, HERC4, HERC6, KBTBD7, MLH1, MRPL45, MYADM, NME2, PDX1, PRRC1, RAD18, RTN4, SEL1L3, SELRC1, SFXN4, SLC25A23, SPRY1, TAGLN, TLR1, TRMT6, TRMT61A, TRNT1, TUBB3, TUBB4A, UBC, ZNF14                                                                                                 | 16              | Cancer, Hereditary Disorder, Renal and Urological Disease                                                 |
| 20      | AKNA, AKR1C3, ARL1, ARMC8, CENPN, CENPO, CHAC1, CUI1A, FAM213B, GCC2, GID8, GIGYF2, GNE, GNPAT1, IQCB1, KNTC1, MAEA, MKLN1, NAGK, NBAS, NPHP4, RALGAP1, RALGAPB, RINT1, RMND5A, RGRIP1L, SCFD2, SEMA52, TBRG1, UBC, UBXN8, WASF2, YIF1A, ZBTB38, ZWILCH                                                                                                         | 16              | Carbohydrate Metabolism, Small Molecule Biochemistry, Hereditary Disorder                                 |
| 21      | ACADSB, AP4B1, AP4M1, AP4S1, CHEST12, CLASP1, CYP4F3, CYP4F11, DDX52, GCLM, GFM1, H2AFV, LRBA, LSR, MCTS1, MEF2B, PIGH, PIGQ, PIGY, PPHLN1, PSMF1, PYCR1, RAB10, RPL17, SEPT8, SLC35B2, SRSF7, STOX1, TBC1D7, TGOLN2, UBC, UQCRL10, UQCRL11, UQCRR, WDR41                                                                                                       | 16              | Hereditary Disorder, Neurological Disease, Metabolic Disease                                              |
| 22      | ADCK1, ANXA8L2 (includes others), ARHGFE26, ASPM, C11orf96, CHML, CYB561, DARC, ESM1, FLT3LG, GAS1, GCNT1, GLI1, GPER, HSPB2, hydroxyproline, ICAM1, IL17F, Integrin alpha V beta 3, MAN1C1, NREP, OVOL1, PDLIM7, PKIG, PLOD1, RAB1A, RAB6A, RNF152, S1PR3, SCG5, SLC13A3, TGFb1, TLR5, TMEM100, TNFSF13B                                                       | 16              | Cell-To-Cell Signaling and Interaction, Cellular Movement, Hematological System Development and Function  |
| 23      | ADAM32, C1orf74, CEP19, CLDN1, DHX8, DNAJC30, EXOSC2, FAM107B, GATA4, GCKR, GOT1, GPR39, GRHRP, HNF1A, HNF4A, HPX, HSD17B2, HSPA4L, IER5, ITIH4, KIAA0101, LAS1L, MFLF1P, NUZF2, REPIN1, RPS25, RRP8, SLC26A1, SLC37A4, SLC38A4, SPC53, TBX18, UGT2B15, ZNF443, ZNF576                                                                                          | 16              | Carbohydrate Metabolism, Molecular Transport, Small Molecule Biochemistry                                 |
| 24      | ATM, CCND1, CCR6, CD3, CDX1, DEF6, DICER1, EIF2B, EPST11, FAM129A, FAM65B, ICOS, IL2, IL-2R, IL2RB1, IL18R1, IL23R, IL7R, KRT80, LINC00667, miR-19b-3p (and other miRNAs w/seed)                                                                                                                                                                                | 16              | Cell-mediated Immune Response, Cellular Development, Cellular Function and Maintenance                    |
|         | GUGCAA, MSLN, NANOS1, NEAT1, PIK3R3, PRKAR2B, PTPN22, RNF139, SATB1, SIPA1L2, SYAP1, Tord, TMEM117, TMSB15A, TNFRSF4                                                                                                                                                                                                                                            |                 |                                                                                                           |

## Legends to supplementary videos 1, 2, 3 and 4

**Supplementary video 1.** HMLE-snail cells were grown at a density of  $1 \times 10^6$  in 100 mm petri dish overnight. After 24 hrs the media was aspirated and the cells were washed with PBS followed by incubation with DMSO for 3 hrs with simultaneous live video recording at 40 X magnification under a EVOS FL microscope system.

**Supplementary video 2.** HMLE-snail cells were grown at a density of  $1 \times 10^6$  in 100 mm petri dish overnight. After 24 hrs the media was aspirated and the cells were washed with PBS followed by incubation with selinexor (KPT-330) for 3 hrs with simultaneous live video recording at 40 X magnification under a EVOS FL microscope system.

**Supplementary video 3.** HMLE-snail cells were grown at a density of  $1 \times 10^6$  in 100 mm petri dish overnight. After 24 hrs the media was aspirated and the cells were washed with PBS followed by incubation with KPT-185 for 3 hrs with simultaneous live video recording at 40 X magnification under a EVOS FL microscope system.

**Supplementary video 4.** HMLE-snail cells were grown at a density of  $1 \times 10^6$  in 100 mm petri dish overnight. After 24 hrs the media was aspirated and the cells were washed with PBS followed by incubation with LMB (500 nM) for 3 hrs with simultaneous live video recording at 40 X magnification under a EVOS FL microscope system.
